# Supplementary material
Source: publisher site journal article supplement (http://e-cmh.org/upload/media/cmh-2023-0515-Supplementary-Table-2.pdf)
Supplement: Supplementary file 1 [file cmh-2023-0515-Supplementary-Table-2.pdf]

**Supplementary Table 2.** Major complications in the patients with pure MASLD (n=1,381)

| Variables                         | Past history<br>Numbers (CR) | Present history<br>New cases (recurrence) |
|-----------------------------------|------------------------------|-------------------------------------------|
| Liver-related events              | n=19 (2)                     | n=77 (4)                                  |
| Gastroesophageal varices/bleeding | 9                            | 17 (2)                                    |
| Hepatocellular cancer             | 7 (2)                        | 37 (1)                                    |
| Decompensated cirrhosis           | 3                            | 23 (1)                                    |
| Cardiovascular disease            | n=46                         | n=51 (4)                                  |
| Coronary artery disease           | 34                           | 31 (3)                                    |
| Heart failure                     | 3                            | 5                                         |
| Arrhythmia                        | 9*                           | 15 (1) <sup>†</sup>                       |
| Stroke                            | n=25                         | n=21 (4)                                  |
| Cerebral infarction               | 17                           | 14 (3)                                    |
| Cerebral hemorrhage               | 6                            | 5 (1)                                     |
| Subarachnoid hemorrhage           | 2                            | 2                                         |

MASLD, metabolic dysfunction-associated steatotic liver disease; CR, complete remission.

\*Atrial fibrillation (n=4), atrioventricular block (n=2), supraventricular arrhythmia (n=2), unknown (n=1). <sup>†</sup>Atrial fibrillation (n=10), sick sinus syndrome (n=2), paroxysmal ventricular tachycardia (n=1), premature atrial contraction (n=1), unknown (n=2).
